# Supplementary material for: Mast Cells Differentiated in Synovial Fluid and Resident in Osteophytes Exalt the Inflammatory Pathology of Osteoarthritis
Source: MDPI journal article supplement (doi:10.3390/ijms23010541), 2022-01-04
Supplement: s1 [file s1]

**Title** - Mast cells differentiated in synovial fluid and resident in osteophytes exalt the inflammatory pathology of osteoarthritis

Priya Kulkarni<sup>1</sup>, Abhay Harsulkar<sup>1,2</sup>, Anne-Grete Märtson<sup>3</sup>, Siim Suutre<sup>4</sup>, Aare Märtson<sup>5,6</sup> and Sulev Koks<sup>7,8\*</sup>

<sup>1</sup>Department of Pathophysiology, Institute of Biomedicine and Translational medicine, University of Tartu, Ravila 19, Tartu- 50411, Estonia

<sup>2</sup>Department of Pharmaceutical Biotechnology, Poona College of Pharmacy, Bharati Vidyapeeth University, Erandwane, Pune – 411038, India

<sup>3</sup>Department of Pharmacology and Therapeutics, University of Liverpool, UK

<sup>4</sup>Department of Anatomy, Institute of Biomedicine and Translational medicine, University of Tartu, Ravila 19, Tartu- 50411, Estonia

<sup>5</sup>Department of Traumatology and Orthopaedics, Institute of Clinical Medicine, University of Tartu, L Puusepa 8, Tartu- 51014, Estonia

<sup>6</sup>Clinic of Traumatology and Orthopaedics, Tartu University Hospital, L Puusepa 8, Tartu- 51014, Estonia

<sup>7</sup>Perron Institute for Neurological and Translational Science, Nedlands, 6009, Western Australia

<sup>8</sup>Centre for Molecular Medicine and Innovative Therapeutics, Murdoch University, Murdoch, 6150, Western Australia

**Supplementary table 1 (ST1): A list of significantly up-regulated and down-regulated genes in the osteophyte samples with their LogFC and *P*-values**

| Up-regulated Genes |          |                 |
|--------------------|----------|-----------------|
| Gene Name          | LogFC    | <i>P</i> -value |
| CPA3               | 4.027533 | 5.09E-18        |
| SELE               | 2.536014 | 2.14E-16        |
| MS4A2              | 4.220766 | 3.78E-15        |
| PLA2G2A            | 4.644088 | 5.87E-12        |
| CSN1S1             | 5.942081 | 1.44E-10        |
| HAPLN1             | 4.354046 | 1.48E-10        |
| GABRA4             | 3.303431 | 4.35E-10        |
| PRG4               | 2.714763 | 5.14E-10        |
| THBS4              | 2.993005 | 6.09E-10        |
| IBSP               | 2.006641 | 7.31E-10        |
| SLC36A2            | 2.247509 | 7.09E-09        |
| HPGD               | 3.213818 | 9.49E-09        |
| OGN                | 2.890213 | 4.86E-08        |
| ASPN               | 2.432588 | 6.50E-08        |
| CTSG               | 6.380478 | 7.17E-08        |
| F5                 | 2.485848 | 1.88E-07        |
| FAM38B             | 2.125555 | 4.49E-07        |
| IL1RL1             | 2.520738 | 8.72E-07        |
| ZIC1               | 4.85166  | 1.12E-06        |
| PRSS35             | 2.469275 | 1.73E-06        |
| STMN2              | 2.835148 | 1.70E-06        |
| MMP-13             | 3.19846  | 2.01E-06        |
| CRTAC1             | 2.740265 | 2.06E-06        |
| SHOX2              | 2.027773 | 7.05E-06        |

|          |          |          |
|----------|----------|----------|
| ACP5     | 2.83225  | 7.15E-06 |
| COMP     | 3.324406 | 9.58E-06 |
| COL1A2   | 2.01073  | 1.29E-05 |
| LRFN5    | 3.088649 | 1.65E-05 |
| TMEM196  | 2.776174 | 1.94E-05 |
| HBA2     | 2.960499 | 2.08E-05 |
| CTSK     | 2.240189 | 2.15E-05 |
| CKB      | 2.25553  | 2.41E-05 |
| GNG4     | 2.377001 | 3.22E-05 |
| ADCYAP1  | 2.582899 | 3.33E-05 |
| CNR1     | 2.254559 | 5.24E-05 |
| ST18     | 2.889322 | 5.83E-05 |
| MMP3     | 3.539804 | 6.33E-05 |
| FZD10    | 2.231317 | 0.000133 |
| GJB2     | 3.455437 | 0.000135 |
| CYP27C1  | 4.37209  | 0.000173 |
| C1orf186 | 3.272109 | 0.000199 |
| HDC      | 2.110747 | 0.000243 |
| CMA1     | 5.007723 | 0.000274 |
| COL1A1   | 2.038679 | 0.000368 |
| SYT6     | 2.129815 | 0.000422 |
| AMPH     | 2.072226 | 0.000523 |
| AMTN     | 3.814246 | 0.000729 |
| TNFSF11  | 2.405489 | 0.001057 |
| GALNT14  | 4.471982 | 0.001105 |
| TRIM11   | 2.051431 | 0.001203 |
| NELL1    | 4.426061 | 0.001209 |
| TIMD4    | 2.79137  | 0.001212 |
| HHIP     | 3.320885 | 0.001394 |
| MRGPRX2  | 4.517302 | 0.001406 |
| GFPT2    | 2.213461 | 0.001616 |
| NPHS1    | 3.499433 | 0.001877 |
| RASL12   | 2.011284 | 0.002044 |
| HEMGN    | 2.173148 | 0.002365 |

| CXCL9                | 2.226117 | 0.002528 |
|----------------------|----------|----------|
| IDO1                 | 3.382825 | 0.002929 |
| MYO3A                | 2.28746  | 0.00321  |
| ADAM23               | 3.193211 | 0.003252 |
| LRRC8E               | 2.234257 | 0.003983 |
| SERPINA5             | 2.802678 | 0.004112 |
| GYPA                 | 2.738816 | 0.004161 |
| SLC4A1               | 4.885617 | 0.004197 |
| LIF                  | 3.908902 | 0.004473 |
| OPCML                | 2.428177 | 0.004786 |
| PART1                | 2.41668  | 0.004784 |
| CXCL10               | 2.225288 | 0.006315 |
| FAM40B               | 2.022329 | 0.00656  |
| C21orf37             | 4.084623 | 0.006829 |
| WFDC1                | 2.136605 | 0.006992 |
| KIF4A                | 2.248998 | 0.007723 |
| FAM133A              | 2.053699 | 0.008372 |
| CLDN10               | 2.516074 | 0.009417 |
| SLC9A2               | 2.165385 | 0.010866 |
| TUBA8                | 2.401238 | 0.010872 |
| CXCL11               | 2.190709 | 0.013103 |
| SULT1B1              | 3.152541 | 0.013765 |
| MMP1                 | 3.027436 | 0.014302 |
| CILP                 | 2.148754 | 0.014409 |
| CRLF1                | 3.817562 | 0.015141 |
| CA1                  | 2.451945 | 0.017428 |
| MARCO                | 3.779762 | 0.018039 |
| LINGO1               | 2.318577 | 0.018117 |
| C10orf105            | 2.176865 | 0.0222   |
| Down-regulated Genes |          |          |
| Gene Name            | LogFC    | P-value  |
| APOB                 | -2.03918 | 9.05E-11 |

|              |          |          |
|--------------|----------|----------|
| CADM2        | -2.95074 | 1.41E-08 |
| TMEFF2       | -4.15435 | 0.000413 |
| GNAZ         | -3.41417 | 0.000625 |
| GABRA2       | -2.77263 | 0.000654 |
| NRG3         | -4.14112 | 0.001502 |
| CHIT1        | -3.25043 | 0.003048 |
| C6orf10      | -3.72459 | 0.003143 |
| NETO1        | -2.91119 | 0.00346  |
| FAM86DP      | -3.6999  | 0.00405  |
| LOC100129345 | -3.6983  | 0.004298 |
| GLIS1        | -3.69735 | 0.004474 |
| IGSF1        | -2.84473 | 0.004914 |
| TRAF2        | -3.68328 | 0.006547 |
| SERPINA12    | -2.98392 | 0.007455 |
| TINAGL1      | -3.55897 | 0.007825 |
| LOC148824    | -3.56945 | 0.009136 |
| C1orf74      | -3.55768 | 0.009161 |
| FLJ30403     | -3.40428 | 0.015644 |
| LOC653113    | -3.43474 | 0.018687 |
| PIAS4        | -3.40745 | 0.020407 |
| PRINS        | -3.40161 | 0.021045 |

**ST2:** A Grade-wise demonstration of key mast-related proteins found in the proteomics analysis of SF

| Protein Name                                                      | Protein Abbreviation | LogFC<br>G2G1 | LogFC<br>G3G1 | LogFC<br>G4G1 | Ref |
|-------------------------------------------------------------------|----------------------|---------------|---------------|---------------|-----|
| Immunoglobulin lambda variable 2-18                               | IGLV2-18             | 37.5896545    | NA            | 37.42546      |     |
| Immunoglobulin lambda variable 3-1                                | IGLV3-1              | 36.59979569   | NA            | NA            |     |
| Immunoglobulin kappa variable 2-40                                | IGKV2-40             | 37.05100621   | 41.67871      | 37.29651      |     |
| Immunoglobulin lambda variable 2-11                               | IGLV2-11             | 2.431556072   | 2.782218      | NA            |     |
| Immunoglobulin superfamily containing leucine-rich repeat protein | ISLR                 | NA            | 39.41972      | NA            |     |
| Immunoglobulin kappa variable 1-13                                | IGKV1-13             | NA            | 37.90953      | NA            |     |
| Immunoglobulin kappa variable 6-21                                | IGKV6-21             | NA            | 36.9165       | NA            |     |
| Immunoglobulin lambda variable 4-69                               | IGLV4-69             | NA            | 2.773235      | NA            |     |
| Immunoglobulin superfamily containing leucine-rich repeat protein | ISLR                 | NA            | NA            | 41.52395      |     |
| Immunoglobulin lambda variable 1-44                               | IGLV1-44             | NA            | NA            | 36.97934      |     |
| Immunoglobulin kappa variable 1-13                                | IGKV1-13             | NA            | NA            | 36.86832      |     |
| Immunoglobulin lambda variable 4-69                               | IGLV4-69             | NA            | NA            | 2.380682      |     |
| Protein S100 (Fragment)                                           | S100A6               | 41.16882      | 40.40297      | 42.1267       |     |
| Protein S100-A8                                                   | S100A8               | 38.80698      | 43.95978      | 43.62165      |     |
| Protein S100-A9                                                   | S100A9               | 38.33136      | 44.35842      | 43.4431       |     |
| Protein S100-A4                                                   | S100A4               | 3.127559      | -37.9506      | 2.521137      |     |
| Protein S100-A11                                                  | S100A11              | 0.747533      | 3.450775      | 4.473638      |     |
| Protein S100-A12                                                  | S100A12              | NA            | 43.6355       | 44.17231      |     |
| Protein S100-P                                                    | S100P                | NA            | 42.32842      | 41.86717      |     |
| Histone H3.1                                                      | H3C1                 | 42.15141      | 43.86723      | 42.13659      |     |

|                                                                       |           |          |          |          |      |
|-----------------------------------------------------------------------|-----------|----------|----------|----------|------|
| Histone H1.2                                                          | H1-2      | 40.8021  | NA       | 40.73825 |      |
| Isoform 1 of Core histone macro-H2A.1                                 | MACROH2A1 | 40.35853 | 41.30319 | 40.28084 |      |
| Histone H2A type 2-B                                                  | H2AC21    | 38.82677 | 40.98707 | NA       |      |
| Histone H2A type 2-C                                                  | H2AC20    | 37.47739 | 38.57285 | 36.1769  |      |
| Histone H1.10                                                         | H1-10     | 36.92155 | 36.63726 | 36.05325 |      |
| Histone H1.5                                                          | H1-5      | 4.143112 | 1.894718 | 3.143245 |      |
| Histone H4                                                            | H4C1      | 4.135902 | 5.062983 | 3.918993 |      |
| Histone H3.2                                                          | H3C15     | 3.952981 | 4.763897 | 3.338169 |      |
| Histone H2A                                                           | H2AZ2     | 3.513314 | 38.20615 | 4.071692 |      |
| Histone H2B                                                           | H2BC15    | 2.290555 | 4.26651  | 2.707146 |      |
| Methionine aminopeptidase 2                                           | METAP2    | 35.78272 | 33.33631 | 35.87134 |      |
| Xaa-Pro aminopeptidase 1                                              | XPNPEP1   | 34.63523 | 37.59244 | NA       |      |
| Aminopeptidase B                                                      | RNPEP     | 2.703409 | 5.132456 | 5.127756 |      |
| Alpha-actinin-1                                                       | ACTN1     | 40.01584 | 44.90512 | 44.6893  |      |
| Actin-related protein 2/3 complex subunit 3                           | ARPC3     | 39.73583 | 42.46596 | 42.05718 |      |
| Actin-related protein 3                                               | ACTR3     | 2.494164 | 4.897881 | 4.0529   |      |
| Alpha-actinin-4                                                       | ACTN4     | 2.359276 | 4.658768 | 4.330454 |      |
| Actin-related protein 2                                               | ACTR2     | 2.279216 | 4.53598  | 3.858559 |      |
| Actin, cytoplasmic 1                                                  | ACTB      | 2.240241 | -37.5188 | 2.776209 | [59] |
| Beta-actin-like protein 2                                             | ACTBL2    | NA       | 37.29973 | 35.91144 | [59] |
| Platelet-activating factor acetylhydrolase IB subunit beta (Fragment) | PAFAH1B2  | 36.83481 | 35.17532 | NA       |      |
| Ras-related protein Rab-7a                                            | RAB7A     | 37.22036 | 39.44037 | 38.90048 | [59] |
| Heat shock cognate 71 kDa protein                                     | HSPA8     | 1.609628 | 1.574592 | 1.596362 | [58] |
| Filamin-A                                                             | FLNA      | 3.974561 | 4.215035 | 3.994411 |      |
| Carboxypeptidase                                                      | CTSA      | 35.9543  | NA       | 35.5287  |      |
| Carboxypeptidase Q                                                    | CPQ       | 1.294259 | 2.359289 | -36.5255 |      |
| Cathepsin L1                                                          | CTSL      | 37.15384 | 36.42123 | NA       |      |
| Cathepsin D                                                           | CTSD      | 2.680759 | 1.436841 | 3.760144 |      |
| Cathepsin G                                                           | CTSG      | -37.5698 | 5.721166 | 5.100312 |      |

|                                                     |         |          |          |          |  |
|-----------------------------------------------------|---------|----------|----------|----------|--|
| Dual specificity mitogen-activated protein kinase 1 | MAP2K1  | 38.16372 | 38.24167 | 36.92404 |  |
| Mitogen-activated protein kinase 1                  | MAPK14  | NA       | 39.43511 | 39.30365 |  |
| Mitogen-activated protein kinase 14                 | MAPK14  | NA       | 39.48305 | 38.15754 |  |
| Mitogen-activated protein kinase                    | MAPK3   | NA       | 36.16989 | 36.2431  |  |
| Phospholipase A2                                    | PLA2G2A | 2.003637 | 2.129905 | 0.998775 |  |

**ST3:** Demographic details of OA patients from whom the osteophytes and control tissue samples were collected for RNA-seq analysis

| Patient No.      | Demographic details                                      |
|------------------|----------------------------------------------------------|
| <b>Patient 1</b> | Age: 76 years<br>Sex: male<br>BMI: 23.78<br>KL grade: 4  |
| <b>Patient 2</b> | Age: 67 years<br>Sex: female<br>BMI: 35<br>KL grade: 4   |
| <b>Patient 3</b> | Age: 69 years<br>Sex: male<br>BMI: 27.7<br>KL grade: 4   |
| <b>Patient 4</b> | Age: 73 years<br>Sex: female<br>BMI: 32.4<br>KL grade: 4 |
| <b>Patient 5</b> | Age: 52 years<br>Sex: female<br>BMI: 35<br>KL grade: 3   |
| <b>Patient 6</b> | Age: 71 years<br>Sex: female<br>BMI: 29.1<br>KL grade: 4 |



**ST4:** Demographic details of OA patients from whom the SF samples were obtained and subjected to proteomics analysis and cell differentiation assay; SF samples obtained from Patient 1 to Patient 12 were used in *in vitro* cell differentiation assay, while the samples from Patient 1 to Patient 16 were used for proteomics analysis

| <b>KL grade-I</b>                                         | <b>KL grade-II</b>                                           | <b>KL grade-III</b>                                          | <b>KL grade-IV</b>                                           |
|-----------------------------------------------------------|--------------------------------------------------------------|--------------------------------------------------------------|--------------------------------------------------------------|
| Patient 1<br>Age – 53 years<br>Sex – male<br>BMI – 28.1   | Patient 2<br>Age – 55 years<br>Sex – male<br>BMI – 30.1      | Patient 3<br>Age – 50 years<br>Sex – female<br>BMI – 18.5    | Patient 4<br>Age – 59 years<br>Sex – male<br>BMI – 27.1      |
| Patient 5<br>Age – 40 years<br>Sex – female<br>BMI – 28.1 | Patient 6<br>Age – 47 years<br>Sex – male<br>BMI – 25.3      | Patient 7<br>Age – 55 years<br>Sex – female<br>BMI – 33.6    | Patient 8<br>Age – 77 years<br>Sex – female<br>BMI – 25.5    |
| Patient 9<br>Age – 70 years<br>Sex - female<br>BMI – 25.4 | Patient 10<br>Age – 67 years<br>Sex - female<br>BMI – 27.5   | Patient 11<br>Age – 68 years<br>Sex - female<br>BMI – 38.5   | Patient 12<br>Age – 70 years<br>Sex - male<br>BMI – 21.1     |
| Patient 13<br>Age – 65 years<br>Sex - male<br>BMI – 27.5  | Patient 14<br>Age – 65 years<br>Sex - male<br>BMI – 26.2     | Patient 15<br>Age – 48 years<br>Sex - male<br>BMI – 28.7     | Patient 16<br>Age – 77 years<br>Sex - female<br>BMI – 22.6   |
| <b>Average age:</b> 57 years<br><b>Average BMI:</b> 27.28 | <b>Average age:</b> 54.25 years<br><b>Average BMI:</b> 27.28 | <b>Average age:</b> 55.25 years<br><b>Average BMI:</b> 29.83 | <b>Average age:</b> 70.75 years<br><b>Average BMI:</b> 24.08 |

#### **SD1: Patient selection criteria for knee replacement surgery**

**Inclusion criteria:** a confirmed OA diagnosis on the basis of clinical signs and symptoms as well as radiological evaluation with KL grade-III and IV and painful daily routine activities like walking, sitting, stair climbing; varus and valgus deformity; age between 40 to 80 years

**Exclusion criteria:** patients with rheumatoid arthritis, infected arthritis, KL grade- III and IV OA patients with tumour, KL grade-III and IV OA patients unfit for surgery due to chronic cardiovascular, renal and liver diseases.

#### **SD2: OA patient selection criteria for arthrocentesis**

OA patients with KL grades – I, II and III, who had knee effusion and required arthrocentesis to relieve the symptoms; OA patients with KL grade-IV who were selected for knee replacement surgery (as per the selection criteria mentioned in **SD1**)

All the patients, who were selected for SF collection, signed a written informed consent before the procedure.
